# Supplementary material
Source: Springer Nature journal article supplement (https://www.springermedizin.de/resource/supplementary/13054_2010_9366_MOESM3_ESM.pdf/9705996)

A

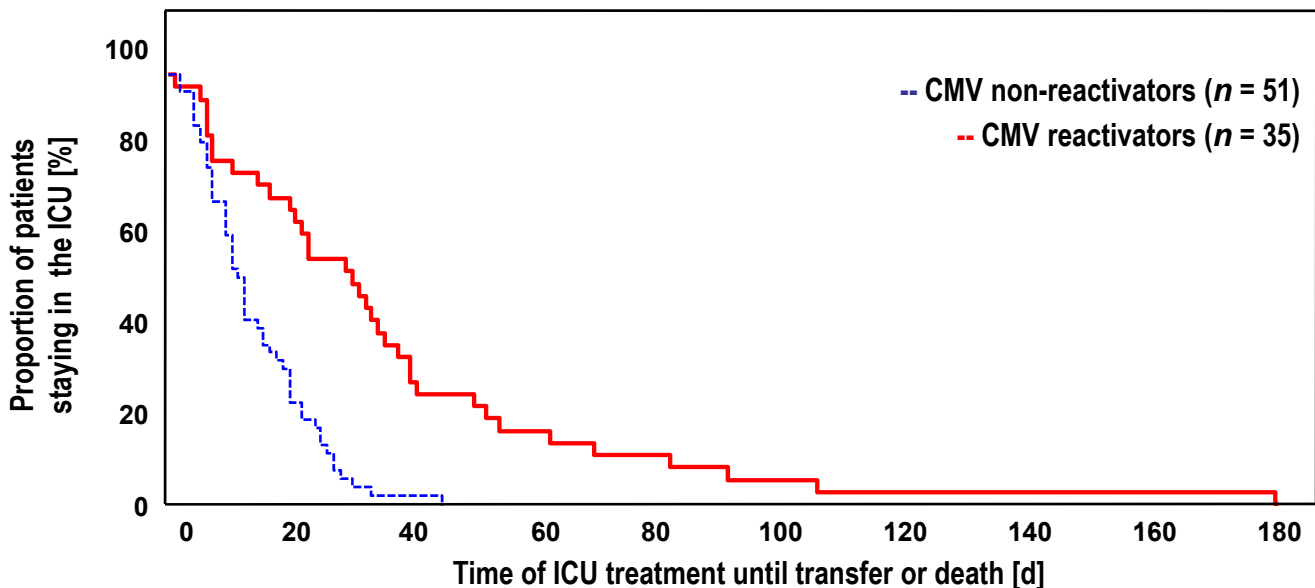

B

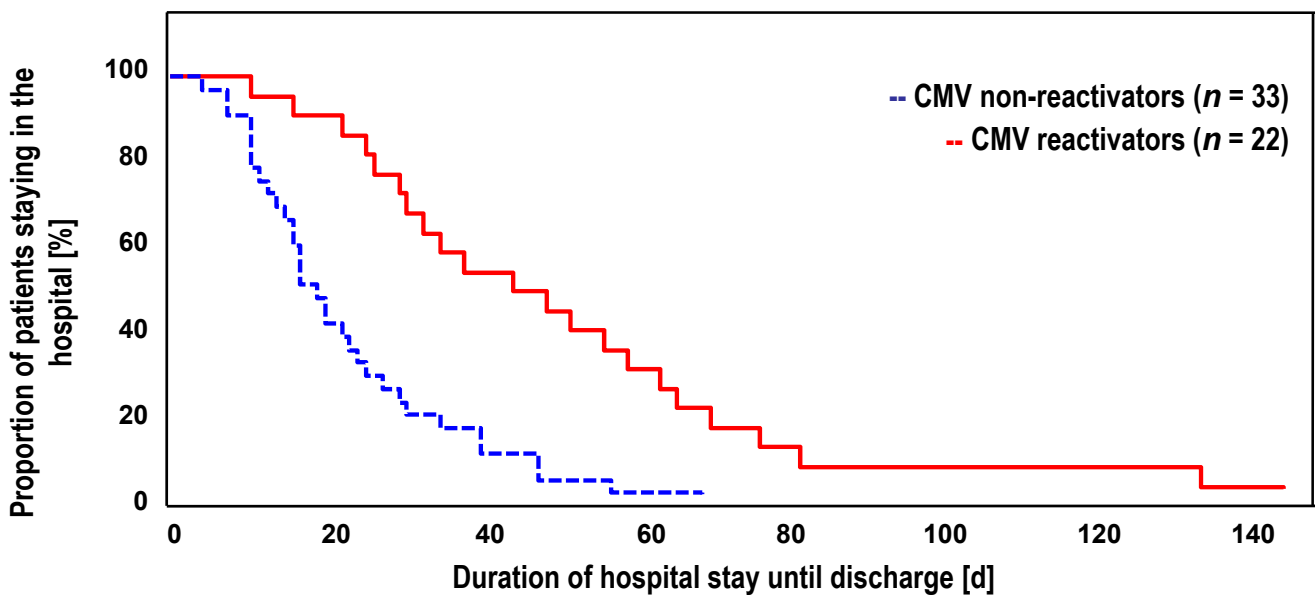

C

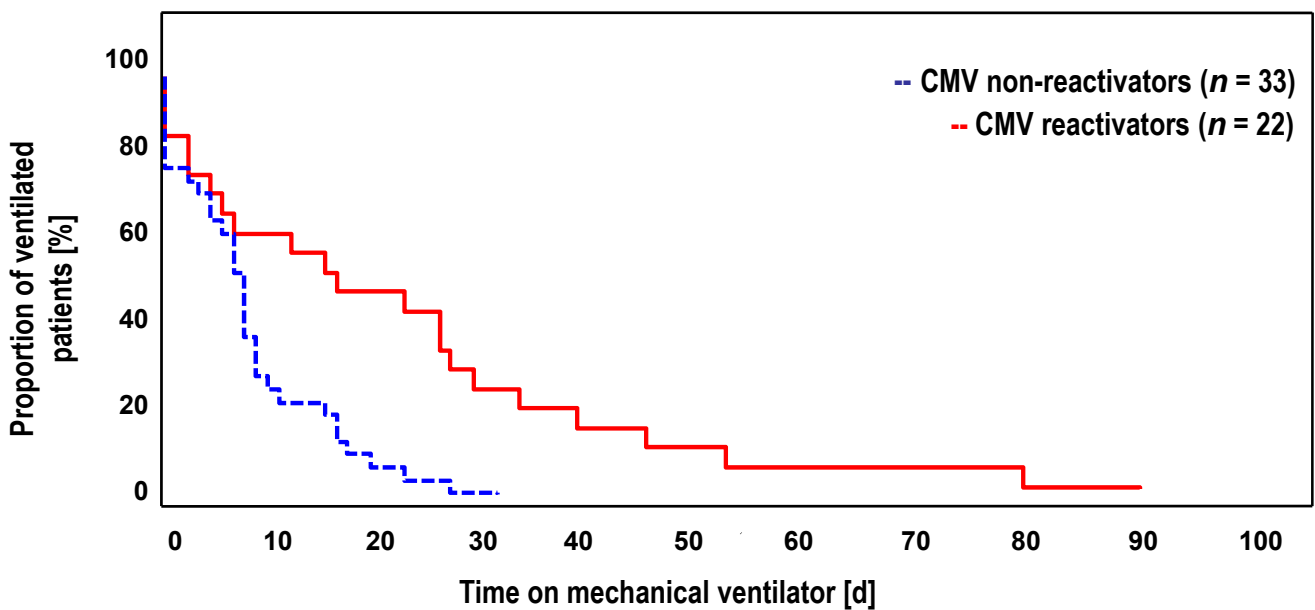

Supplement: MOESM3 [file 9705996]
